# Supplementary material for: The Non-Homologous End Joining Protein PAXX Acts to Restrict HSV-1 Infection
Source: PubMed Central journal article supplement (PMC5707549; doi:10.3390/v9110342), 2017-11-16
Supplement: viruses-09-00342-s001.pdf [file viruses-09-00342-s001.pdf]

## Supplementary materials

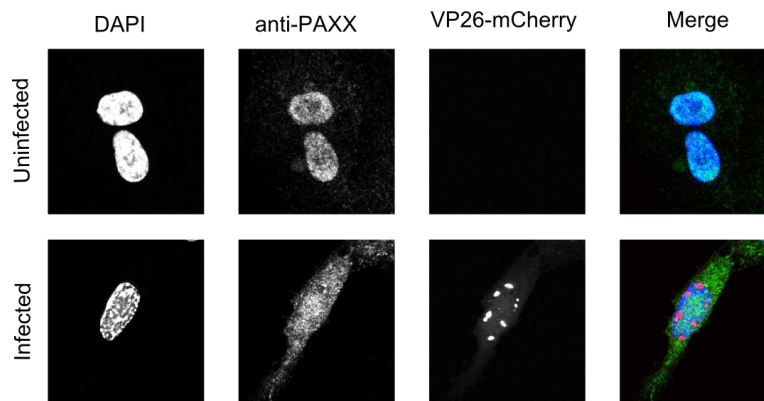

**Supplementary Figure 1:** PAXX localisation changes during HSV-1 infection in RPE cells. RPE cells were infected with HSV-1 VP26-GFP at an MOI of 1 for 24 hours and analysed by immunofluorescence using an anti-PAXX antibody.

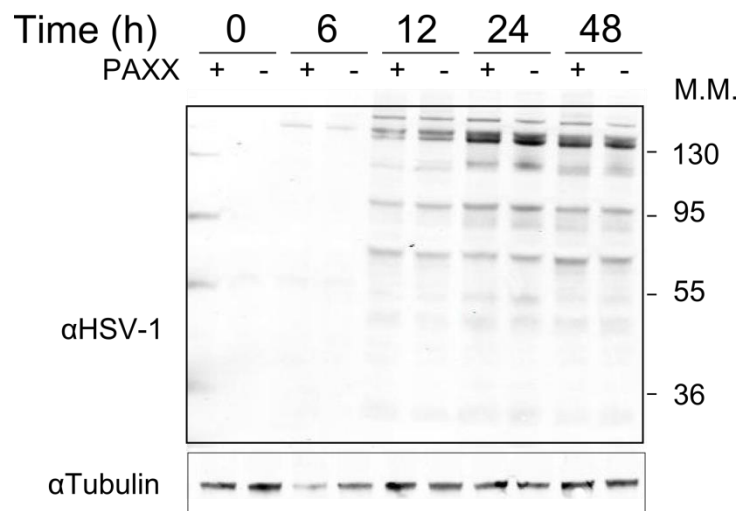

**Supplementary Figure 2:** Effect of PAXX on HSV-1 protein production. WT and *PAXX*<sup>-/-</sup> RPE-1 cells were infected at MOI 4 and analysed by immunoblotting at various time points post infection using the indicated antibodies.
